# Supplementary material
Source: Elsevier journal article supplement (https://www.sciencedirect.com/science/article/pii/S1413867022000216)
Supplement: mmc1 [file S1413867022000216:mmc1.xlsx]

## Sheet: Table_1
Supplementary Table 1. A brief summary of the 10 papers reviewed in this study.
Reference	Title	Algorithms	Evaluation metrics	Sample size	Evaluated drugs	Main-conclusions	Limitations
Yang et al. (2018)	Machine learning for classifying tuberculosis drug-resistance from DNA sequencing data	Supervised Algorithms: Logistic Regression; Support Vector Machine; Random Forest; Product-of-marginals model; Class-conditional Bernoulli mixture model; Unsupervised Algorithms: Principal Component Analysis; Sparse Logistic Principal Component Analysis.	Sensitivity; Specificity; AUC	1839	isoniazid, rifampicin, ethambutol, pyrazinamide, ciprofloxacin, moxifloxacin, ofloxacin, streptomycin	The authors concluded that (i) Sparse Logistic Principal Component Analysis performed better in identification of distinguished classes within a cluster. (ii) Models generated using the Product-of-Marginals and the Support Vector Machine with Radial Basis Function kernel were the best performers. The authors also mentioned that it’d be worth investigating in future, the effect of (i) inclusion of…	(i) The size of the cohort was small (ii) there were not many resistance cases in the cohort (iii) all polymorphisms were treated as resistance conferring and
Yang et al. (2019)	DeepAMR for predicting co-occurrent resistance of Mycobacterium tuberculosis	Supervised Algorithms: Deep denoising auto-encoder algorithm, Multi-label K-nearest neighbour, Ensemble Classifier Chain, Support Vector Machine, Random Forest	Sensitivity; Specificity; AUC; F1 score	8388	isoniazid, ethambutol, rifampicin, pyrazinamide	The authors noted that for MDR-TB, Deep Denoising Auto-coder algorithm, that relies on non-linear dimensionality reduction suitable for sparse datasets (like mutation datasets) performed better than other algorithms in the study, while achieving best sensitivity scores against all drugs, except for rifampicin	(i) The inaccurate phenotyping for second-line drugs would introduce large error in the classification for first-line drugs and (ii) a small number of resistant isolates would result in over-fitting easily for such a complex model (iii) the performance evaluation using sensitivity, specificity and AUC might not be the best for evaluating multi-label learning
Chen et al. (2018)	Deep Learning Predicts Tuberculosis Drug Resistance Status from Whole-Genome Sequencing Data	Supervised Algorithms: Regularized Logistic Regression, Random Forest; Unsupervised Algorithms: Single-task and Multi-task Wide and Deep Neural Network, Deep Multilayer Perceptrons.	Sensitivity; Specificity; AUC	3601	rifampicin, isoniazid, pyrazinamide, ethambutol, streptomycin, ciprofloxacin, moxifloxacin, ofloxacin, capreomycin, amikacin, kanamycin	The authors concluded that the multi-task Wide and Deep Neural Network (i) performed favourably and achieved a higher sum of specificity and sensitivity when compared to all the other models, (ii) was able to rank the mutations according to their confidence level for prediction of resistance, and (iii) was able to share the information / learning across the various drugs rather than treating each…	(i) Possible bias due to errors during phenotyping (ii) Inclusion of only those mutations that occurred in >0.8% (30 of 3,601 isolates) individually or when aggregated with other rare variants in the same gene or intergenic region. (iii) Exlcusion of third-line anti-tubercular drugs such as cycloserine or para-aminosalicylic acid due to the lack of phenotypic data. (iv) Understanding the improved…
Chen et al. (2019)	Beyond multidrug resistance: Leveraging rare variants with machine and statistical learning models in Mycobacterium tuberculosis resistance prediction	Supervised Algorithms: Regularized Logistic Regression, Random Forest; Unsupervised Algorithms: Single-task and Multi-task Wide and Deep Neural Network, Deep Multilayer Perceptrons.	Sensitivity; Specificity; AUC; Prediction time per isolate	3601	rifampicin, isoniazid, pyrazinamide, ethambutol, streptomycin, ciprofloxacin, moxifloxacin, ofloxacin, capreomycin, amikacin, kanamycin	The inclusion of rare variants and frequent resistance-conferring variants improved the performance of the ML methods, indicating that these variants are good predictors of resistance for both models, the simpler regularized linear regression as well as the more sophisticated multi-task (multi-drug) wide and deep neural network applicable across various lineages of MTB. The authors also mentioned…	Similar limitations as the previous paper by Chen (i) Possible bias due to errors during phenotyping (ii) Inclusion of only those mutations that occurred in >0.8% (30 of 3,601 isolates) individually or when aggregated with other rare variants in the same gene or intergenic region. (iii) Exlcusion of third-line anti-tubercular drugs such as cycloserine or para-aminosalicylic acid due to the lack o…
Deelder et al. (2019)	Machine learning for classifying tuberculosis drug-resistance from DNA sequencing data	Supervised Algorithms: Linear Regression; Classification Tree; Gradient Boosted Tree	Sensitivity; Specificity; AUC	16688	rifampicin, isoniazid, ethambuto, pyrazinamide, ciprofloxacin, ofloxacin, moxifloxacin, amikacin , kanamycin, capreomycin , paraaminosalisylic acid , cycloserine, ethionamide	The study concluded that (i) The Gradient Boosted Tree model trained with co-occurrent resistance markers outperformed the Gradient Boosted Tree trained without these resistance markers (ii) The Classification Tree models successfully captured the most common mutations driving resistance. The authors highlighted that the quantitative minimum inhibitory concentration (MIC) scores as phenotypes cou…	(i) The authors cautioned against clinical application as the inclusion of co-occurrent resistance markers and (ii) the ability of genome-wide Gradient Boosted Tree model to capture covariate interactions, might not translate optimally into clinical environments since (iii) Mentioned that the markers by themselves, might be more indicative of transmissibility rather than drug resistance.
Kouchaki et al. (2018)	Application of machine learning techniques to tuberculosis drug resistance analysis	Supervised Algorithms: Logistic Regression; Support Vector Machine; Random Forest; Gradient Boosted Tree	F1 score; Sensitivity; Specificity; AUC	13402	isoniazid, rifampicin, ethambutol, pyrazinamide, streptomycin, fluoroquinolones-ofloxacin, moxifloxacin, ciprofloxacin, kanamycin, amikacin, capreomycin	The authors reported enhancement in the performance of Logistic Regression model and Gradient Boosting Trees model when used in conjunction with a dimensionality reduction of number of features using sparse Principal Component Analysis / Non-Negative Matrix Factorization algorithms in terms of F1 score, for second line TB drugs. For future work, the authors mentioned that (i) inclusion of positio…	(i) Possible errors in phenotypes (ii) Assumption of resistance independence for each drug (labels learned independently) (iii) Independence of feature space for classification, considering all variants to have the same importance (iv) Ignoring missing labels and considering null calls in an isolate as no variant (v) There might be some lineage related mutations as well as frequently appeared mut…
Kouchaki et al. (2020)	Multi-Label Random Forest Model for Tuberculosis Drug Resistance Classification and Mutation Ranking	Supervised Algorithms: Single-label and Multi-label Random Forests	Sensitivity; Specificity; AUC	13402	isoniazid, rifampicin, ethambutol, pyrazinamide	Multi-label classification technique was explored since each sample in the dataset was associated with multiple labels such as resistant/susceptible to multiple drugs and multi-label learning is well suited for the supervised learning problems where several labels are learned simultaneously. Moreover, MLRF ensemble method is well suited for imbalanced datasets which is not unusual in the study of…	(i) possible inclusion of errors in phenotypes (ii) considering equal importance for all mutations (iii) ignoring data with missing labels (iv) random selection may also affect the selection of rare but important mutations (v) assumption of feature ranking should be that the input features are independent and there is no correlation amongts them.
Chowdhury et al. (2019)	Capreomycin resistance prediction in two species of Mycobacterium using a stacked ensemble method	Supervised Algorithms: Generalized Linear Model; C5.0; Support Vector Machine, Stacked Ensemble	Sensitivity; Specificity; AUC; Accuracy	8777	capreomycin	The authors highlighted that using protein sequences as a foundation offers a better basis for further downstream analysis since a greater number of features are discernible from protein sequences and the stacked ensemble model with the Generalized Linear Model meta-classifier was observed to give the superior performance.	The availability of data and therefore the size of the dataset. The accuracy levels would be higher with larger dataset.
Kavvas et al. (2018)	Machine learning and structural analysis of Mycobacterium tuberculosis pan-genome identifies genetic signatures of antibiotic resistance	Supervised Algorithms: Support Vector Machine	Sensitivity; AUC	1595	ethambutol, para-aminosalicylic acid, isoniazid, pyrazinamide, rifampicin, streptomycin, ofloxacin, ethionamide	The authors, instead of relying upon the alignment-based feature engineering, relied upon allele-based pan-genomic basis for feature engineering which does not reduce non-H37Rv variants to a collection of SNPs, while capturing the strain-to-strain variation observed in the bacterial genomes without biasing the variations relative to a single reference genome such as Mycobacterium tuberculosis. Th…	(i) Use of known gene-antibiotic relationship does not provide enough information to deduce association of a region to a particular drug (ii) Inclusion of structural features provided enough foundation for identifying potential evolutionary factor, it does not prove causality (iii) The approach does account for systemic relationships between the allele and biochemical flux. In addition, the autho…
Nguyen et al. (2020)	Predicting antimicrobial resistance using conserved genes	Supervised Algorithms: XGBoost, Random Forest	F1 score	5353	amikacin, capreomycin, ethambutol, ethionamide, isoniazid, kanamycin, moxifloxacin, ofloxacin, pyrazinamide, rifampin, streptomycin	The authors trained ML models only on the conserved core-gene set of pathogens and instead of building upon comprehensive sequence. The models displayed a similar behaviour for the F1 score across antibiotics for accuracy as well as error rates. Furthermore, the authors highlighted that it may be possible to develop this into a strategy for making AMR phenotype predictions for contigs that are bi…	(i) The error rates were higher for models trained only with the core-genes (ii) the models developed as part of this study do not meet clinical accuracy or error rate requirements.
